# Supplementary material for: The preparation of a three dimensional terbium doped reduced graphene oxide aerogel with photoluminescence and paramagnetic properties
Source: Royal Society of Chemistry journal article supplement (doi:10.1039/c7ra12087g), 2018-01-01
Supplement: c7ra12087g1.pdf [file c7ra12087g1.pdf]

The preparation of a three dimensional terbium doped reduced graphene oxide aerogel with photoluminescence, paramagnetic properties

Keqin Chen<sup>a‡</sup>, Hui Gao<sup>a\*‡</sup>, Dongdong Wang<sup>a</sup>, Xiaolong Li<sup>b \*</sup>, Deying Wang<sup>a</sup>, Waheed Ullah Khan<sup>a</sup>

<sup>a</sup>School of Physical Science and Technology, Key Laboratory for Magnetism and Magnetic Materials of Ministry of Education, Lanzhou University, Lanzhou 730000, P.R. China, National & Local Joint Engineering Laboratory for Optical Conversion Materials and Technology, Key Laboratory of Special Function Materials and Structure Design, Ministry of Education. E-mail: hope@lzu.edu.cn; Fax: +86-931-8913554; Tel: +86-18993181143.

<sup>b</sup> Shanghai Synchrotron Radiation Facility, Shanghai Institute of Applied Physics, Chinese Academy of Sciences, Shanghai 201204, P. R. China. E-mail: lixiaolong@sinap.ac.cn

‡ These authors contributed equally to the article.

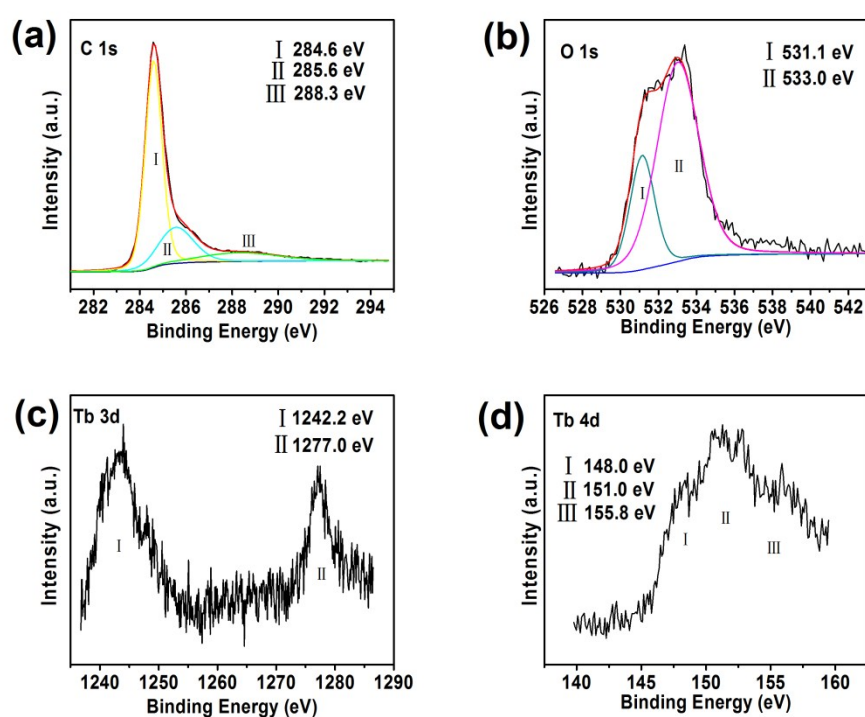

Fig. S1 the XPS survey spectrum of rGO-2. XPS high resolution spectra of C 1s (a), O 1s (b), Tb 3d (c), Tb 4d (d) core levels in rGO-2.

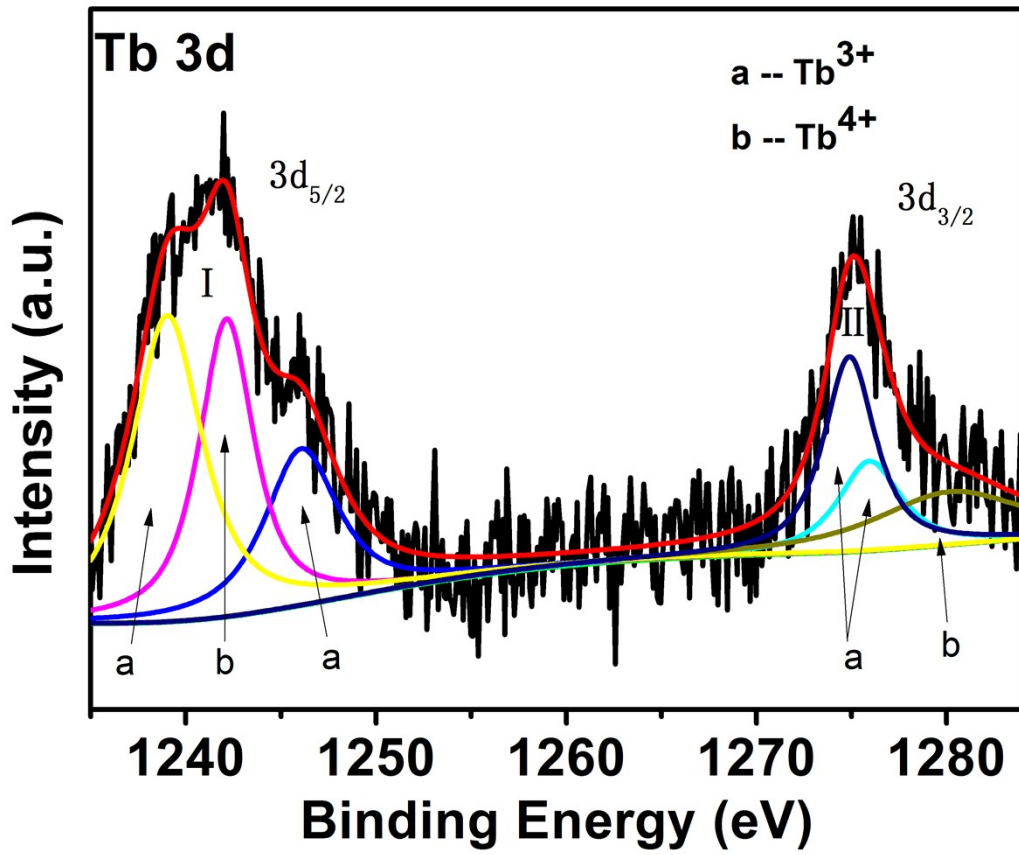

Fig. S2 the fitting curve of XPS spectrum for terbium atom.

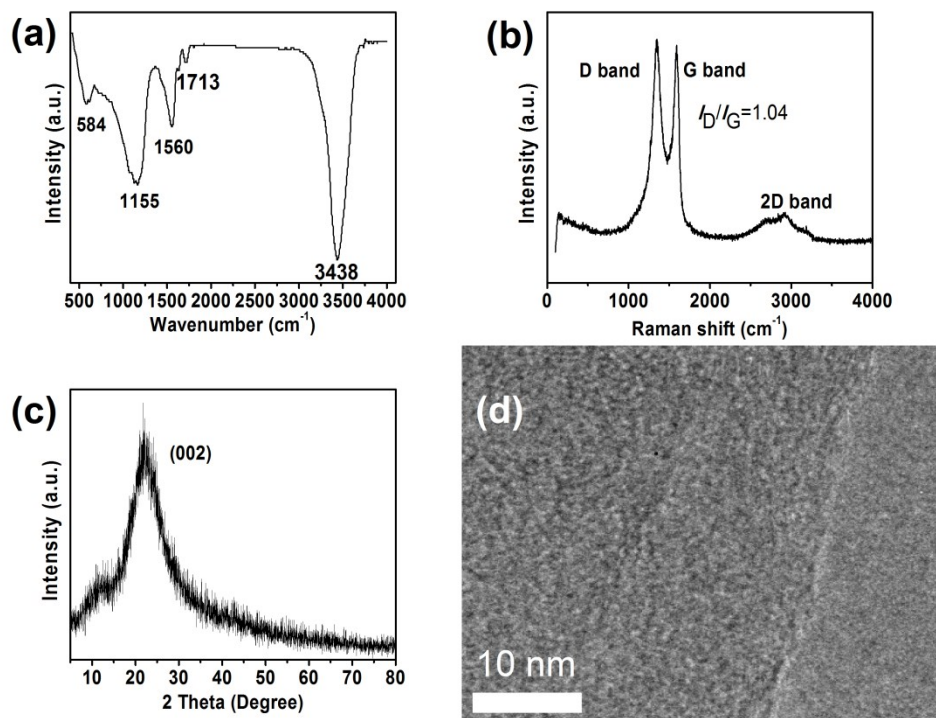

Fig. S3 FT-IR (a), Raman (b), XRD spectrum (c) and HR-TEM (d) of rGO-2.

Table S1 the BET data of the rGO-2

| Method         | Surface Area                                 | Pore Volume               | Pore Size                                  |
|----------------|----------------------------------------------|---------------------------|--------------------------------------------|
| BJH adsorption | 25.26 m <sup>2</sup> /g                      | 0.1701 cm <sup>3</sup> /g | 26.93 nm                                   |
| BJH desorption | 33.30 m <sup>2</sup> /g                      | 0.1713 cm <sup>3</sup> /g | 20.58 nm                                   |
|                | 25.3 m <sup>2</sup> /g (BET<br>Surface Area) |                           | 9.68 nm (adsorption<br>average pore width) |

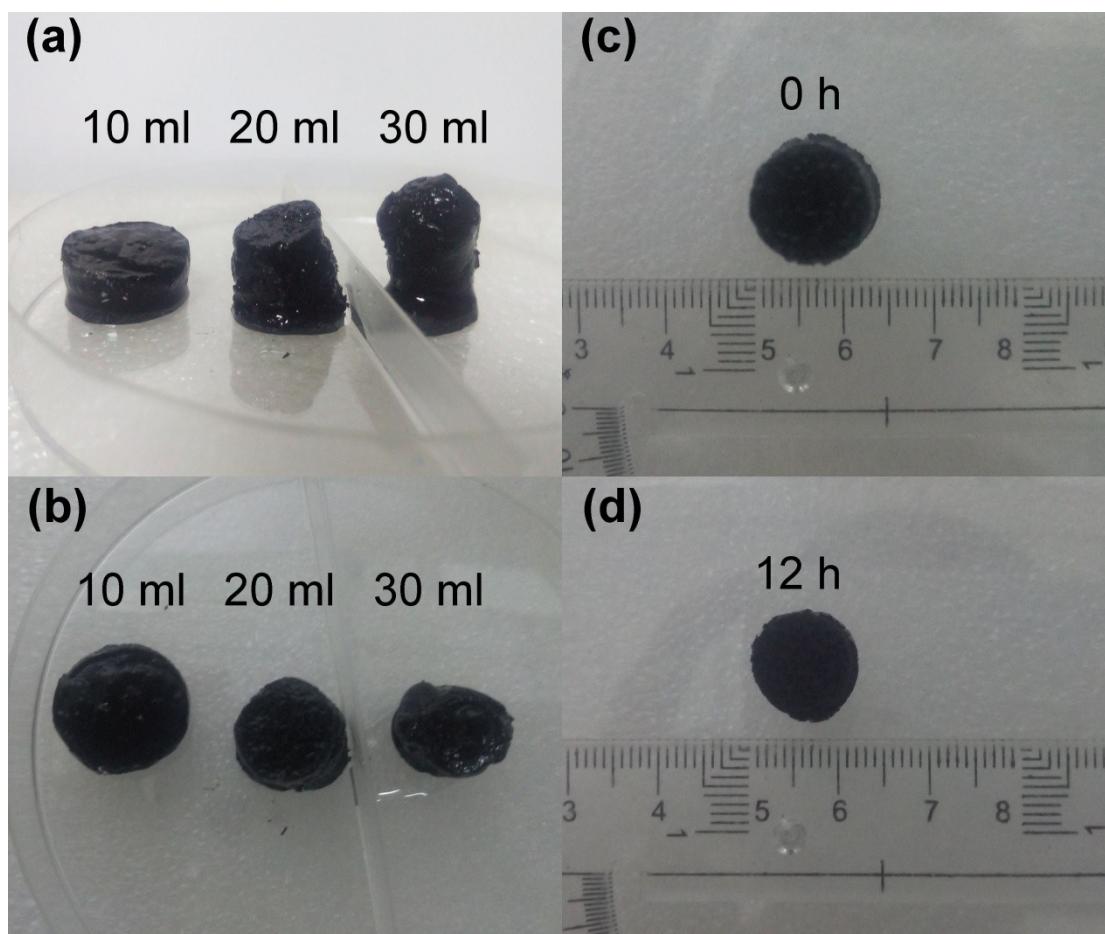

Fig. S4 the photos of nucleation area factor (a) and (b), air drying experiment (c) and (d) for volume of rGO.

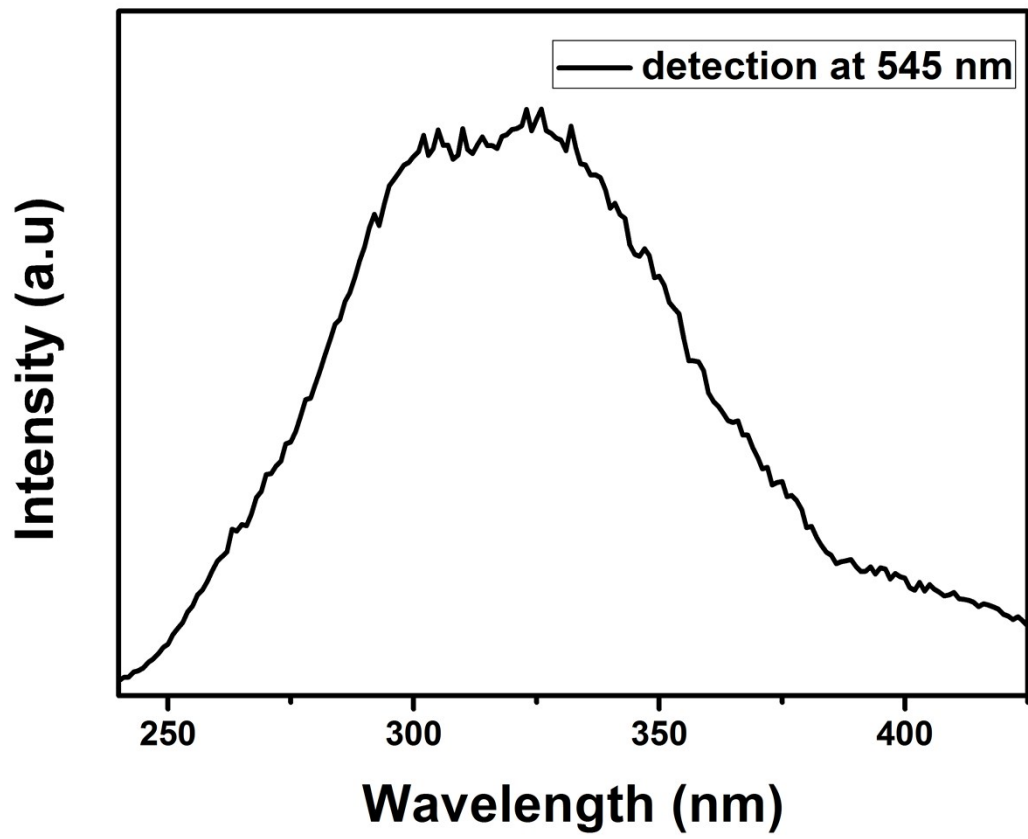

Fig. S5 PLE spectrum of rGO-2.

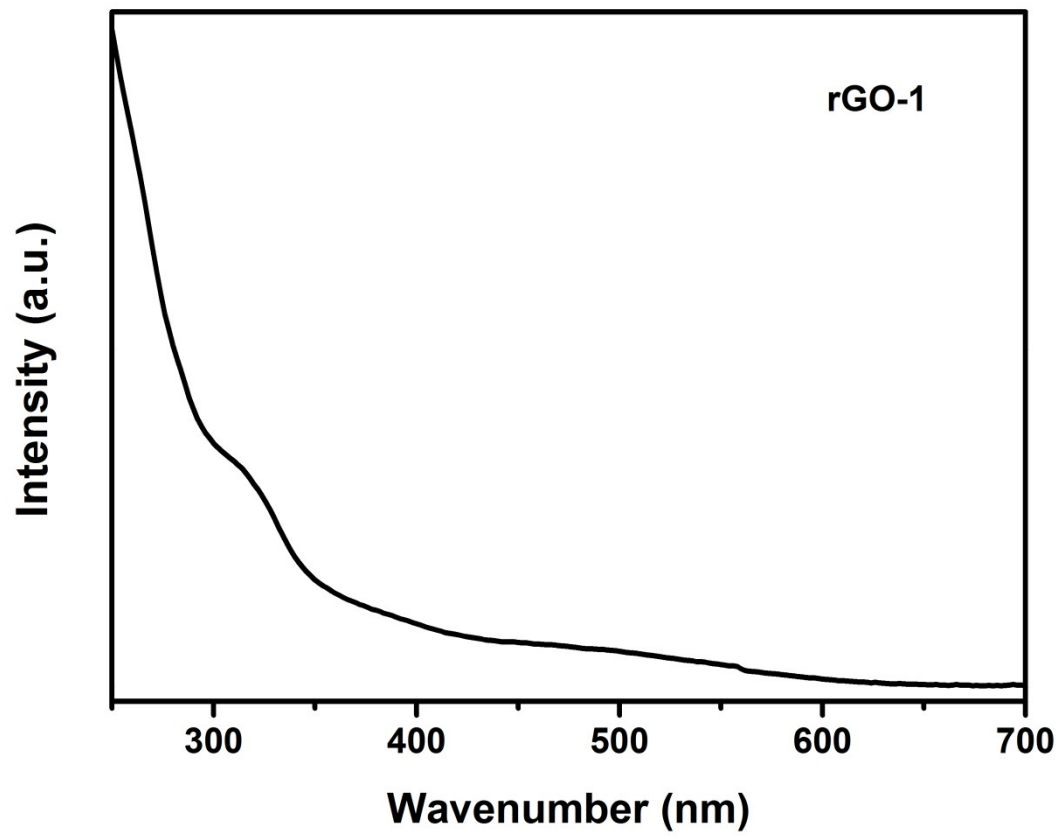

Fig. S6 UV-vis Adsorption spectrum of rGO-1.

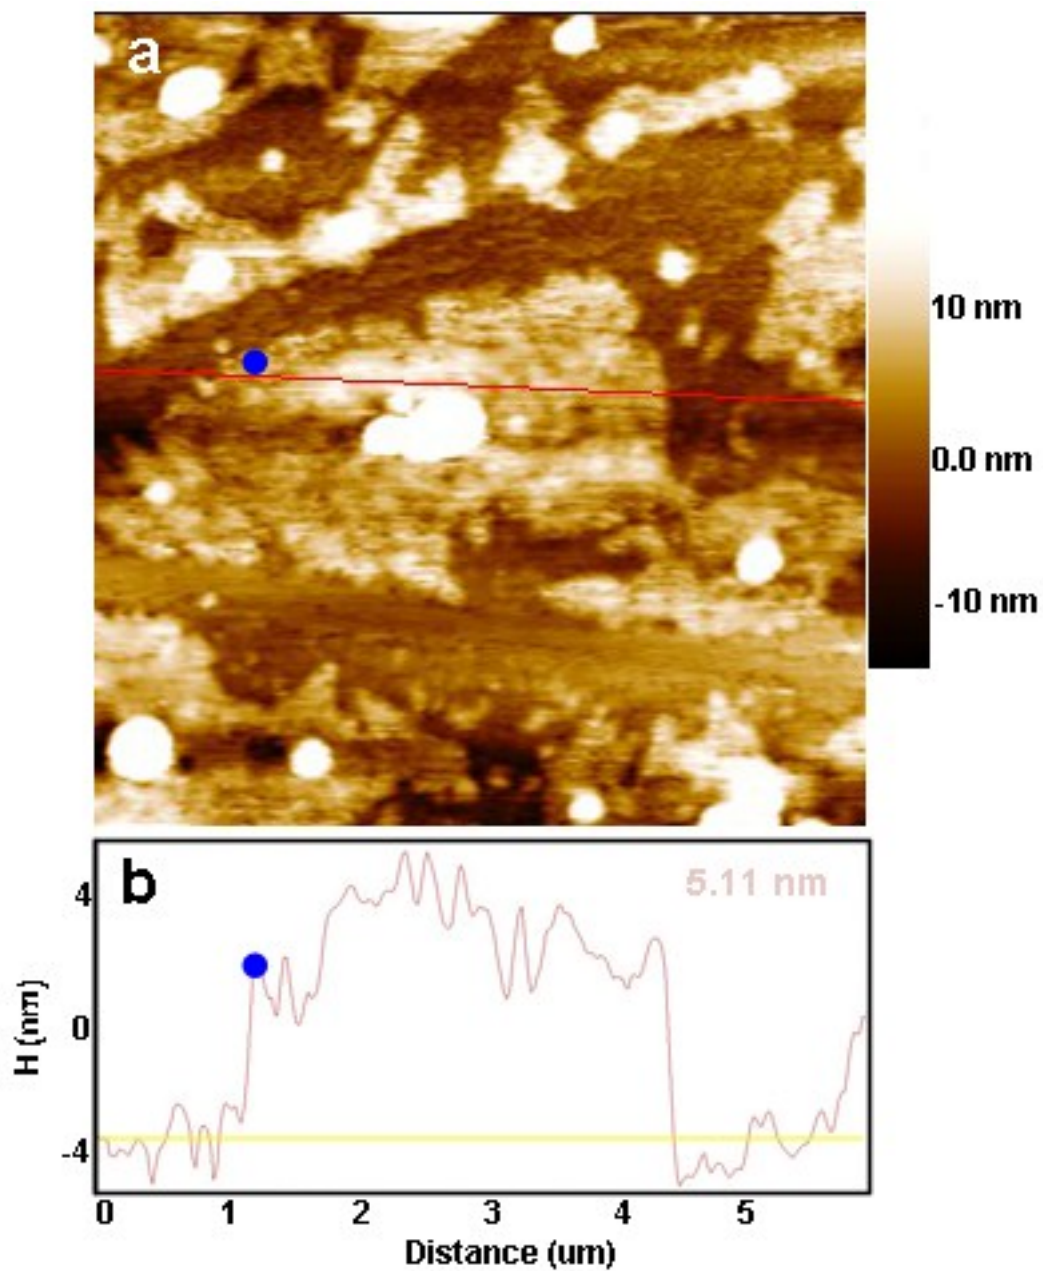

Fig. S7 (a) AFM image of rGO-2. (b) The height distribution according to the scanning line marked in the AFM image.
